1 ***Title***

- 2 • Machine Learning Classifier Models for Predicting Sarcopenia in the Elderly Based  
3 on Physical Factors

4

5 ***Name of Author (Academic degree)***

- 6 • Emmett Kim, PhD, PT (ORCID: 0000-0002-2385-6843)

7

8 ***Affiliation***

- 9 • DataAid Research Team

10

11 ***Corresponding Author***

- 12 • Emmett Kim, PhD, PT

13

14 ***E-mail***

- 15 • [emetk2310@gmail.com](mailto:emetk2310@gmail.com)

16

17 ***Telephone***

- 18 • +82-2-670-3379

19

20

## ABSTRACT

21

22 **Background:** As the elderly population gradually increases, musculoskeletal disorders such as  
23 sarcopenia are increasing. Diagnostic techniques such as X-ray, CT, and MRI imaging are used to  
24 predict and diagnose sarcopenia, and methods using machine learning are gradually increasing.

25 **Purpose:** The purpose of this study was to create a model that can predict sarcopenia using physical  
26 characteristics and activity-related variables without medical diagnostic equipment such as imaging  
27 equipment for the elderly aged 60 years or older.

28 **Method:** A sarcopenia prediction model was constructed using public data obtained from the Korea  
29 National Health and Nutrition Examination Survey. Models were built using the multi-layer  
30 perceptron, XGBoost, LightGBM, and RandomForest algorithms, and the feature importance of the  
31 model with the highest accuracy was analyzed through evaluation metrics.

32 **Result:** The sarcopenia prediction model built with the LightGBM algorithm showed the highest test  
33 accuracy at 0.852. In constructing the LightGBM model, physical characteristics variables such as  
34 BMI showed high importance, and activity-related variables were also used in constructing the model.

35 **Conclusion:** The sarcopenia prediction model composed only of physical characteristics and activity-  
36 related factors showed excellent performance, and the use of this model will help predict sarcopenia  
37 in the elderly living in communities with insufficient medical resources or difficult access to medical  
38 facilities.

39

40 **Keywords:** Sarcopenia, predictive model, machine learning, physical characteristics, physical activity

41

42

## 43 I. INTRODUCTION

44 A decrease in skeletal muscle and consequent decrease in muscle strength can be seen as a  
45 representative physical change in the elderly.(1) The amount of skeletal muscle decreases by about 8%  
46 every 10 years (annual average of 0.8%) from the age of 40, and after the age of 70, more rapid  
47 muscle loss occurs, and it appears to decrease by about 15% for 10 years.(1) As such, rapid changes in  
48 body composition and body functions, such as muscle loss due to aging, can be defined as  
49 sarcopenia.(1) The prevalence of sarcopenia shows a tendency to gradually increase with increasing  
50 age.(2) In Korea, 13.0% of males and 21.7% of females in the middle-aged (40 to 59 years) had  
51 sarcopenia, and 21.6% of males and 30.7% of females in the elderly (60 or older) had sarcopenia.(2)

52 The clinical significance of sarcopenia can be summarized as a decrease in muscle strength due to a  
53 decrease in muscle mass, and an accompanying increase in physical disability and mortality.  
54 Sarcopenia has been reported to be closely related to physical dysfunction, and in particular, problems  
55 such as decreased gait function or increased risk of falling have been reported.(3,4) In addition,  
56 sarcopenia was often accompanied by diseases such as metabolic dysfunction or geriatric chronic  
57 diseases, and was also considered to be the cause of these diseases.(5,6) Therefore, sarcopenia due to  
58 aging directly causes muscle strength deterioration, leading to deterioration of physical function, and  
59 may cause or accompany chronic disabilities, and may increase the risk of death in the elderly.(7)

60 According to the definition of sarcopenia, measurement of absolute muscle mass is the best  
61 assessment indicator for diagnosing sarcopenia.(8) Therefore, examination using imaging measures  
62 such as MRI or CT to measure absolute muscle mass is currently considered the gold standard for  
63 diagnosing sarcopenia.(9) These two imaging techniques show the highest accuracy and  
64 reproducibility, and based on high image resolution, it is possible to selectively measure only muscles  
65 excluding fat among tissues composing the body.(10) However, imaging using MRI or CT is  
66 expensive and requires skilled operator experience and skill.(10) In addition, patients require high  
67 compliance with MRI or CT imaging, and in the case of CT, patients may be exposed to high levels of  
68 radiation.(10) For this reason, in clinical practice, sarcopenia is diagnosed using dual-energy X-ray

69 absorptiometry (DXA), which has a low radiation exposure and is relatively easy to measure.(9,10)  
70 DXA can measure body composition by classifying it into bone mineral content, body fat mass, and  
71 lean body mass, and can measure it separately for each limb and trunk.(10) The sum of the muscle  
72 mass excluding the bone mineral mass from the lean body mass of both limbs is called the  
73 appendicular skeletal muscle mass (ASM) and is used as a major indicator in the diagnosis of  
74 sarcopenia.(11) If even these diagnostic methods are difficult to apply, sarcopenia can be diagnosed  
75 with bioelectrical impedance analysis (BIA).(12) In addition to diagnosing sarcopenia using these  
76 devices, attempts have been made to prevent or improve sarcopenia by more simply and easily  
77 diagnosing sarcopenia through functional tests such as grip strength and walking speed.(13,14)  
78 However, studies diagnosing sarcopenia using simple functional tests, such as grip strength, appear  
79 differently depending on the race of subjects, or the methods of measuring functional factors used in  
80 studies have not yet been standardized or consistent.(15,16)

81 Recently, to overcome the limitations of assessments for diagnosing sarcopenia, methods for  
82 diagnosis through models using machine learning have been studied and presented. Machine learning  
83 is a technique that can predict a specific value or classification by using a large amount of data  
84 containing various variables.(17) A machine learning model that diagnoses image data through  
85 clinical measurement equipment instead of an expert is being built to improve the accuracy of  
86 diagnosing sarcopenia, and it is also possible to predict sarcopenia using imaging data from abdomen  
87 or chest rather than limbs.(18–20) In addition, it is possible to diagnose sarcopenia or predict the risk  
88 by modeling variables that can be related, such as physical characteristics, nutrition, and blood-related  
89 variables, using machine learning, rather than analyzing only a few variables such as muscle strength  
90 or walking speed.(21,22) These studies suggested that the prediction of sarcopenia using a machine  
91 learning model would be more efficient in terms of time and cost than the traditional method of  
92 diagnosing sarcopenia using imaging measurements.(19,21)

93 Although these predictors are said to be efficient in terms of time and cost, to measure these  
94 variables, medical devices or precise examinations by experts are required. This suggests that it may

95 be difficult to perform assessments according to the elderly living in underdeveloped facilities with  
96 poor access to medical facilities or the rapidly growing elderly population.(8) Therefore, a model that  
97 can be used as a screening or predict the risk of sarcopenia before using medical equipment or  
98 performing a detailed examination by an expert to diagnose sarcopenia in the elderly will be needed.  
99 Such a model should be composed of variables that are related to sarcopenia and are easy to measure,  
100 such as physical characteristics and activities.(23,24)

101 Therefore, the purpose of this study was to create a predictive model for diagnosing sarcopenia  
102 based on easily measurable variables such as physical characteristics and activity-related variables. To  
103 build this predictive model, the following steps were required. First, it was to find out which variables  
104 are needed to build models among variables related to physical characteristics and activities. Second,  
105 it was to build several models with selected variables and improve performance through  
106 hyperparameter tuning. Third, it was to compare various models and select the model with the best  
107 performance among them. Fourth, it was to find out which variables had the highest importance in  
108 constructing the best performing model.

109

110 **II. MATERIALS AND METHODS**

111 *1. Data Source*

112 The flow of this research process is shown in Figure 1. Data from the Korea National Health and  
113 Nutrition Examination Survey (KNHANES) conducted by the Korea Disease Control and Prevention  
114 Agency from 2008 to 2011 were used in this study. A total of 37,753 samples were investigated during  
115 that period. Among the data samples, there were a total of 5,573 data samples with dual energy x-ray  
116 data, age 60 years or older, and no missing responses to physical characteristics and activity-related  
117 variables. Data samples used in the study were provided with permission from the Korea Disease  
118 Control and Prevention Agency as data with personal identification information deleted.

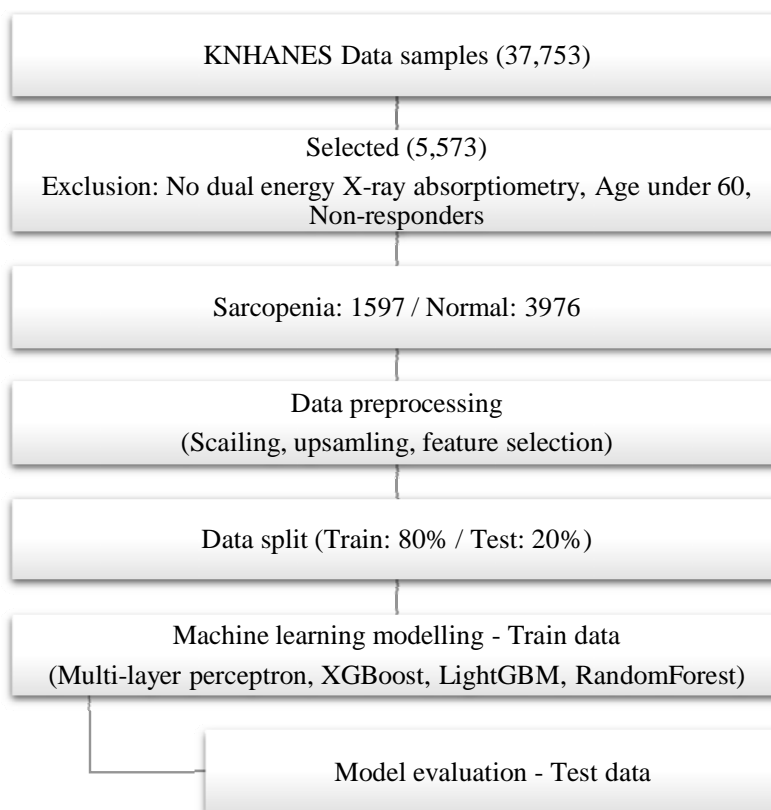

119

120 Figure 1. Flowchart of the study

121

122

123 2. Data Preprocessing

124 This study used variables reflecting physical characteristics such as age, sex, height, weight and  
 125 BMI, and variables reflecting the degree of physical activity such as working hours or exercise  
 126 participation time per week. Table. 1 shows the variables and descriptions of the data samples used in  
 127 this study. Categorical variables were quantified through LabelEncoder, and numerical variables were  
 128 standardized using StandardScaler. To avoid overfitting and poor performance due to imbalanced data,  
 129 SMOTE was used to randomly generate data samples to match the proportions between the data.  
 130 LASSO algorithm was used to select features to use the multi-layer perceptron (MLP) model. And  
 131 RFECV (Recursive Feature Elimination with Cross-Validation) was used for feature selection of  
 132 XGBoost, LightGBM, and RandomForest models. Finally, before training the models, the entire  
 133 dataset was divided into a training dataset and a test dataset at a ratio of 8:2.

Table 1. Description of variables

| <b>KNHANES</b> | <b>Description</b>                  | <b>Sarcopenia</b>      | <b>Normal</b>           |
|----------------|-------------------------------------|------------------------|-------------------------|
| age            | Age                                 | 70.76±6.17             | 68.54±5.84              |
| sex            | Gender                              | M:941, F:656           | M:1467, F:2509          |
| HE_ht          | Height                              | 159.03±8.85            | 157.03±8.89             |
| HE_wt          | Weight                              | 54.09±8.31             | 61.39±9.95              |
| HE_wc          | Waist circumference                 | 78.88±8.61             | 86.02±8.87              |
| BMI            | Body mass index                     | 21.34±2.41             | 24.81±2.94              |
| BO1_1          | Weight change                       | N:1170, I:353,<br>D:74 | N:2980, I:676,<br>D:320 |
| EQ5D           | Quality of life                     | 0.86 0.18              | 0.87 0.17               |
| EC_wht_23      | Average working hours per week      | 16.45 24.77            | 18.53 25.5              |
| BE3_11         | Vigorous physical activity per week | 1.58 1.63              | 1.76 1.78               |
| BE3_21         | Moderate physical activity per week | 2.12 2.17              | 2.56 2.45               |
| BE3_31         | Walking days per week               | 5.33 2.82              | 5.27 2.79               |
| LQ4_00         | Activity restriction                | Y:537, N:1060          | Y:1217, N:2759          |
| EC1_1          | Occupational activity               | Y:605, N:992           | Y:1704, N:2272          |

134

135

136 3. *Machine learning algorithms*

137 A sarcopenia prediction model was developed using four machine learning algorithms: MLP,  
138 XGBoost, LightGBM, and RandomForest. This study used a MLP model with one input layer, one  
139 output layer and five hidden layers with varying numbers of nodes. The ReLU activation function was  
140 used for the hidden layers, while the sigmoid activation function was used for the output layer.  
141 Dropout ratio and batch normalization were applied to prevent overfitting, and the Adam optimizer  
142 was used for gradient descent. The data was split with a 0.2 validation ratio, and EarlyStopping was  
143 used to terminate learning when the validation loss did not improve for 20 epochs. The other three  
144 models used the StratifiedKFold for cross-validation to ensure unbiased performance. This technique  
145 partitions the data into K folds and ensures that each fold contains approximately equal proportions of  
146 samples from each class. This allows the model to be trained and evaluated on a representative subset  
147 of the data to obtain a more accurate performance estimate. In this study, a 5-fold training data set was  
148 created for each model, and the model was built by repeating training and validation five times. The  
149 hyperparameters of each model were then tuned using the GridSearchCV technique.

150

151 4. *Model evaluation*

152 The model's performance was assessed by comparing its predicted and actual classes using a  
153 confusion matrix that includes TP (true positive), FP (false positive), FN (false negative), and TN  
154 (true negative) values, based on test data. The accuracy, precision, recall, and F1-score were  
155 calculated from the matrix to evaluate the models. In addition, models were compared using the ROC  
156 AUC curve. Through the feature importance of the model with the highest accuracy, important factors  
157 in generating the model were analyzed.

158



159 **III. RESULTS**

160 *1. Feature selection*

161 All the mean test scores of the models according to variable selection using RFECV and LASSO  
 162 exceeded 0.75. The variables selected and excluded for each algorithm to build the predictive models  
 163 for sarcopenia diagnosis, and the mean test scores are shown in Table 2.

Table 2. Feature selection and mean test scores through LASSO and RFECV

|                               | Mean test score | Selected variables                                                                                        | Excluded variables          |
|-------------------------------|-----------------|-----------------------------------------------------------------------------------------------------------|-----------------------------|
| <b>Multi-layer Perceptron</b> | 0.773           | age, sex, LQ4_00, EQ5D, EC_wht_23, BE3_11, BE3_21, HE_wt, HE_wc, HE_BMI (10)                              | EC1_1, BO1_1, BE3_31, HE_ht |
| <b>XGBoost</b>                | 0.835           | age, sex, EQ5D, EC_wht_23, BO1_1, BE3_11, BE3_21, BE3_31, HE_wt, HE_wc, HE_BMI (11)                       | LQ4_00, EC1_1, HE_ht        |
| <b>LightGBM</b>               | 0.834           | age, sex, EQ5D, EC_wht_23, BE3_11, BE3_21, BE3_31, HE_ht, HE_wt, HE_wc, HE_BMI (11)                       | LQ4_00, EC1_1, BO1_1        |
| <b>RandomForest</b>           | 0.847           | age, sex, LQ4_00, EQ5D, EC1_1, EC_wht_23, BO1_1, BE3_11, BE3_21, BE3_31, HE_ht, HE_wt, HE_wc, HE_BMI (14) | -                           |

164

165 *2. Model performance*

166 Figure 2 shows the confusion matrix created with test data to evaluate the performance of models  
 167 built with MLP, XGBoost, LightGBM, and RandomForest. Based on confusion matrix, the MLP  
 168 model showed the lowest performance with an accuracy of 0.79 when evaluated with test data. The  
 169 model with the highest performance was the model composed of the LightGBM algorithm. The test  
 170 accuracy of this model was 0.852, showing slightly higher performance than models using XGBoost  
 171 and RandomForest algorithms. Table 3 shows the accuracy, precision, recall, and F1-score of the  
 172 models using the multi-layer perceptron, XGBoost, LightGBM, and RandomForest algorithms. The  
 173 models compared through the ROC-AUC curve showed similar high performance except for the MLP  
 174 model (Figure 3).

175

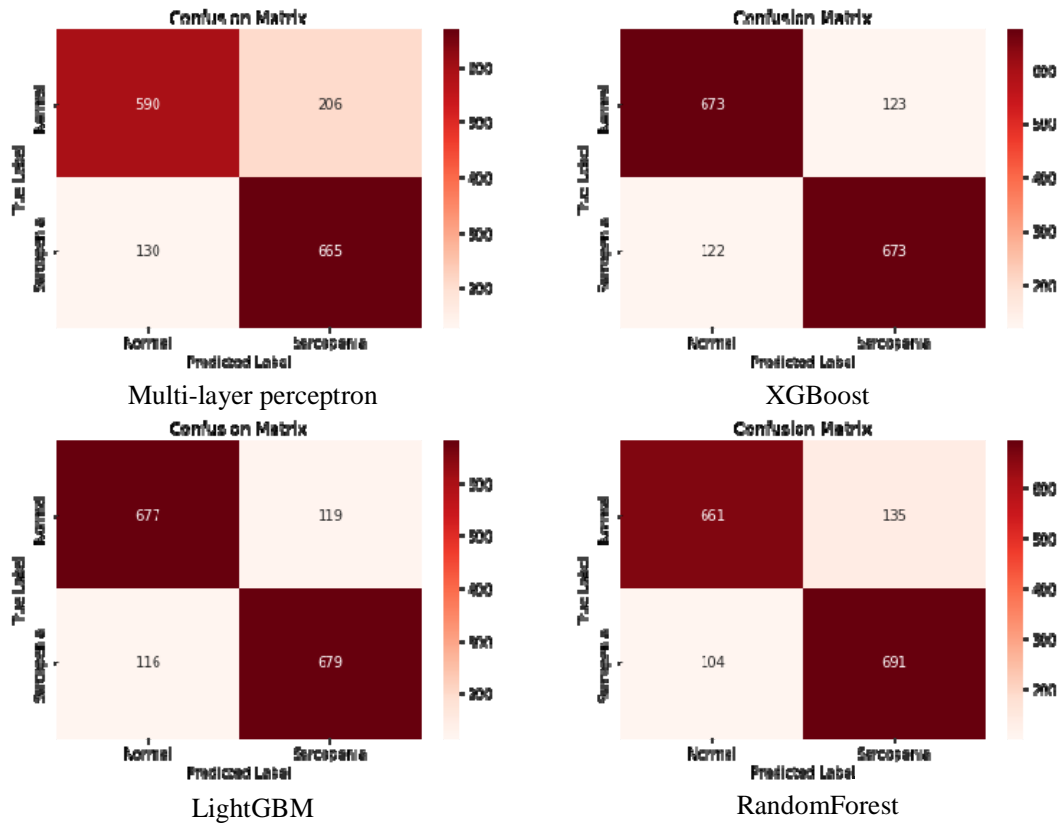

Figure 2. Confusion matrix of sarcopenia prediction model

176

Table 3. Model evaluation scores

|                               | Training Accuracy | Test Accuracy | Precision | Recall | F-1 score |
|-------------------------------|-------------------|---------------|-----------|--------|-----------|
| <b>Multi-layer Perceptron</b> | 0.793             | 0.789         | 0.763     | 0.836  | 0.798     |
| <b>XGBoost</b>                | 0.851             | 0.846         | 0.845     | 0.847  | 0.846     |
| <b>LightGBM</b>               | 0.850             | 0.852         | 0.851     | 0.854  | 0.852     |
| <b>RandomForest</b>           | 0.840             | 0.850         | 0.837     | 0.869  | 0.853     |

177

178

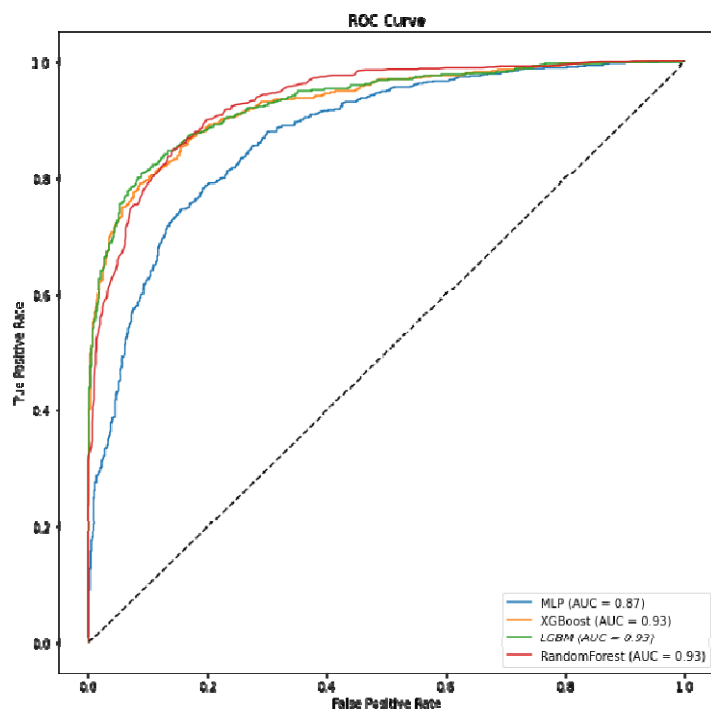

Figure 3. ROC-AUC curve

179

180

### 181 3. Feature importance

182 The variable with the highest importance in constructing the LightGBM model in predicting  
183 sarcopenia was BMI (Figure 4). In addition, variables related to individual physical characteristics  
184 such as age, waist circumference, height, and weight were found to be important variables in  
185 constructing a sarcopenia prediction model. EQ-5D, which represents health-related quality of life,  
186 was found to be an important variable in model construction next to variables representing individual  
187 physical characteristics, and variables such as the number of hours of work participation per week  
188 were the next most important variables, followed by the number of days of participation in walking or  
189 moderate- and high-intensity exercise. Gender appeared to be the least important variable in  
190 constructing the sarcopenia prediction model.

191

192

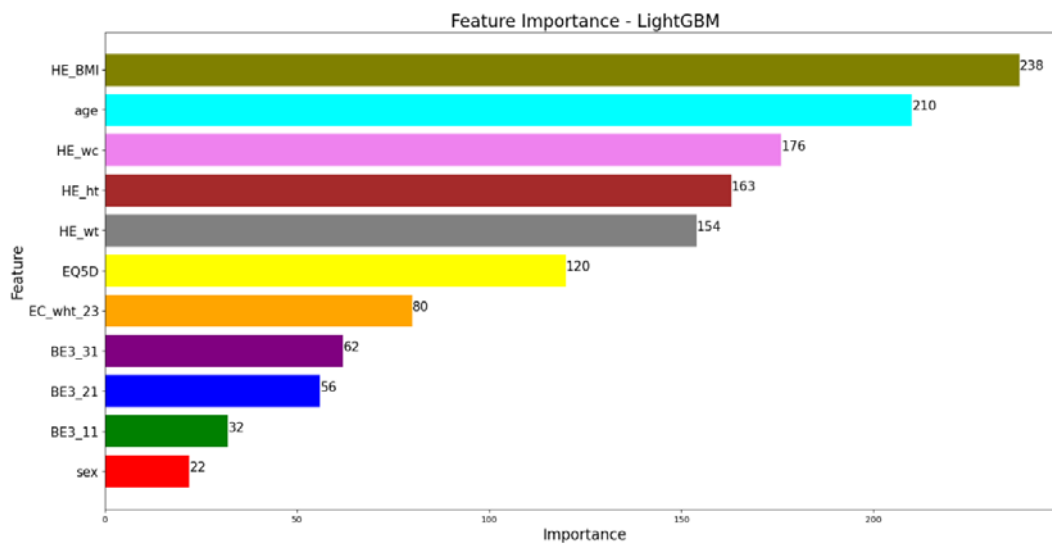

Figure 4. Feature importance of LightGBM model

193

194

#### 195 IV. DISCUSSION

196 The purpose of this study was to create a model to predict the diagnosis of sarcopenia in the elderly  
197 with relatively easy-to-obtain physical characteristics and activity-related variables compared to  
198 variables measured by experts with medical equipment such as DXA to measure lean muscle mass.  
199 The sarcopenia prediction model constructed in this study showed an accuracy performance of about  
200 85% or more, except for the MLP model. In constructing a high-performance model, variables related  
201 to individual physical characteristics such as BMI and age were the most important, followed by  
202 variables related to exercise participation or occupational activity.

203 The machine learning model built with the data measured by the diagnostic imaging equipment  
204 showed a relatively high level of accuracy. Burns al. (2020) built a machine learning model to predict  
205 sarcopenia using abdominal cross-sectional CT taken at the lumbar level of an elderly person, and the  
206 accuracy (expressed as AUC score) of this model was around 94%.<sup>(19)</sup> Ryu et al. (2022) built a  
207 model to predict the prevalence of sarcopenia using chest X-ray data in a simpler way than CT scan,  
208 and the accuracy (expressed as AUC score) of this model was 74-88%.<sup>(20)</sup> In addition, even when the  
209 machine learning model was constructed with variables other than those measured by imaging  
210 equipment, it showed high performance in diagnosing sarcopenia. Ko et al. (2021) developed a model  
211 with 81-88% accuracy by analyzing patterns during timed-up-and-go (TUG) and 6-minute walk test  
212 (6mWT) by machine learning using an IMU sensor.<sup>(25)</sup> Kang et al. (2019) created a model to predict  
213 sarcopenia with 78-82% accuracy (expressed as AUC score) using physical variables such as BMI and  
214 age, blood-related variables such as red blood cell count and white blood cell count, and dietary  
215 variables such as fiber intake, fat intake, and protein intake.<sup>(21)</sup> Similarly, the AUC score of the  
216 sarcopenia prediction model using body characteristics and physical activity variables in this study  
217 was 87-93%. In addition, the accuracy reached about 85% for three of the four models. The  
218 performance of the sarcopenia prediction model generated through this study did not show  
219 outstanding performance compared to other models. Nevertheless, there are several advantages  
220 compared to sarcopenia predictive models in other studies. First, the variables used to build the model

221 in this study were factors that did not require imaging techniques using expensive medical equipment  
222 such as X-ray, CT, and MRI. Second, the variables in this study did not require invasive testing for  
223 human specimens, such as blood-related factors or muscle biopsies. Third, the variables used in model  
224 construction were not variables that required high-level skills to measure or that had to be measured  
225 by experts. Considering these advantages, even if the examiners or investigators do not have high-  
226 level skills, they will be able to measure the data used in this model, and even the subjects will be able  
227 to measure themselves using scales or questionnaires. In addition, the subject can be remotely It may  
228 be possible to input data and remotely receive sarcopenia prediction results for these data.

229 Variables related to physical characteristics showed high importance in constructing the LGBM  
230 model, which showed the highest accuracy among the models in this study. BMI showed the highest  
231 feature importance, followed by age, waist circumference, height, and weight. In the case of  
232 sarcopenia in Asian elderly with diabetes, it was found that sarcopenia decreased significantly as BMI  
233 increased.(26) In addition, according to the model for predicting sarcopenia constructed with the  
234 RandomForest algorithm by Kim et al (2019), BMI served as the first variable to classify the elderly  
235 over 60 as sarcopenia and normal.(27) According to the deep learning model built by Somasundaram  
236 et al (2022) for the diagnosis of sarcopenia in adolescents, the skeletal muscle area measured by  
237 abdominal CT at the L3 level, one of the markers of sarcopenia diagnosis, showed a high correlation  
238 (0.75-0.94) with weight, height, age, and BMI in adolescence.(28) Based on these studies, the model  
239 constructed in our study would also have shown high importance in constructing the model for  
240 physical characteristics variables. In addition, studies related to sarcopenia and quality of life have  
241 been conducted. According to the review article, 4 studies measuring quality of life with the Short-  
242 form General Health Survey (SF-36) and 2 studies using the EQ-5D instrument, Subjects with  
243 sarcopenia were found to have significantly higher rates of problems related to quality of life.(29) For  
244 this reason, in the model of this study, EQ-5D would have shown the highest importance next to  
245 physical characteristics. The feature importance of physical activity-related variables in the model  
246 created in this study was lower than that of physical characteristics or quality of life variables.  
247 Nevertheless, the importance of physical activity in preventing muscle loss has been emphasized.(30)

248 There is also evidence that physical activity, a modifiable lifestyle behavior, can partially reverse age-  
249 related skeletal muscle dysfunction.(30,31) Therefore, variables related to physical activity can be  
250 used as predictive variables in constructing a sarcopenia prediction model even if the feature  
251 importance is not high.

252 There are several limitations in this study. First, the sarcopenia predictive model of this study was  
253 constructed using data of the elderly over 60 years of age, so the performance of this model cannot be  
254 guaranteed for predicting sarcopenia in adolescents or young people. Second, in constructing the  
255 predictive model in this study, the model may have been overfitted because upsampling was used to  
256 balance the number of sarcopenia and normal data. Third, according to the inherent characteristics of  
257 machine learning models, it was possible to infer the correlation of variables related to sarcopenia  
258 prediction by calculating the feature importance in model creation, but it was difficult to interpret it as  
259 a causal relationship. Future studies will need to build a model by additionally collecting data from  
260 various age groups, and additionally discover several variables that are expected to have a high impact  
261 on sarcopenia and use them to construct a model. In addition, research to identify the causal  
262 relationship between variables representing high feature importance and sarcopenia through a  
263 machine learning model should be conducted.

264

265 **V. CONCLUSION**

266 In this study, a sarcopenia prediction model was created using physical characteristics and activity  
267 variables of sarcopenia and normal elderly over 60 years of age. The performance of the model  
268 showed an accuracy of about 85%, and physical characteristics variables such as BMI, age, height,  
269 and weight were found to be important in constructing this model. In addition, through feature  
270 importance, it was found that activity-related variables such as EQ-5D, occupational activity, and  
271 number of days participating in physical activity were also used to construct the model. Since this  
272 model was constructed using relatively easy-to-measure variables without using medical equipment, it  
273 will be able to help predict and prevent sarcopenia in the elderly in areas with insufficient medical  
274 resources or poor access to medical facilities.

275



276 **VI. References**

- 277 1. Mitchell WK, Williams J, Atherton P, Larvin M, Lund J, Narici M. Sarcopenia, dynapenia,  
278 and the impact of advancing age on human skeletal muscle size and strength; a quantitative  
279 review. *Front Physiol.* 2012;3:260.
- 280 2. Oh JM, Choi J-H, Lee YJ, Lee YR, Youn NH, Song HJ. Association between sarcopenia and  
281 health-related quality of life in Korean adults: based on the Fifth Korean National Health and  
282 Nutrition Examination Survey (2010-2011). *Korean J Fam Pract.* 2017;7(6):870–6.
- 283 3. Woo N, Kim SH. Sarcopenia influences fall-related injuries in community-dwelling older  
284 adults. *Geriatr Nurs (Minneap).* 2014;35(4):279–82.
- 285 4. Perez□Sousa MA, Venegas□Sanabria LC, Chavarro□Carvajal DA, Cano□Gutierrez CA,  
286 Izquierdo M, Correa□Bautista JE, et al. Gait speed as a mediator of the effect of sarcopenia on  
287 dependency in activities of daily living. *J Cachexia Sarcopenia Muscle.* 2019;10(5):1009–15.
- 288 5. Biolo G, Cederholm T, Muscaritoli M. Muscle contractile and metabolic dysfunction is a  
289 common feature of sarcopenia of aging and chronic diseases: from sarcopenic obesity to  
290 cachexia. *Clin Nutr.* 2014;33(5):737–48.
- 291 6. Lim H-S, Park Y-H, Suh K, Yoo MH, Park HK, Kim HJ, et al. Association between  
292 sarcopenia, sarcopenic obesity, and chronic disease in Korean elderly. *J Bone Metab.*  
293 2018;25(3):187.
- 294 7. Chang S, Lin P. Systematic literature review and meta□analysis of the association of  
295 sarcopenia with mortality. *Worldviews Evidence□Based Nurs.* 2016;13(2):153–62.
- 296 8. Beaudart C, Rizzoli R, Bruyère O, Reginster J-Y, Biver E. Sarcopenia: burden and challenges  
297 for public health. *Arch public Heal.* 2014;72(1):1–8.
- 298 9. Albano D, Messina C, Vitale J, Sconfienza LM. Imaging of sarcopenia: old evidence and new  
299 insights. *Eur Radiol.* 2020;30:2199–208.

- 300 10. Guglielmi G, Ponti F, Agostini M, Amadori M, Battista G, Bazzocchi A. The role of DXA in  
301 sarcopenia. *Aging Clin Exp Res*. 2016;28:1047–60.
- 302 11. Belarmino G, Gonzalez MC, Sala P, Torrinhas RS, Andraus W, D’Albuquerque LAC, et al.  
303 Diagnosing sarcopenia in male patients with cirrhosis by dual-energy X-ray absorptiometry  
304 estimates of appendicular skeletal muscle mass. *J Parenter Enter Nutr*. 2018;42(1):24–36.
- 305 12. Gonzalez MC, Barbosa-Silva TG, Heymsfield SB. Bioelectrical impedance analysis in the  
306 assessment of sarcopenia. *Curr Opin Clin Nutr Metab Care*. 2018;21(5):366–74.
- 307 13. Yuki A, Ando F, Shimokata H. Transdisciplinary approach for sarcopenia. *Sarcopenia:*  
308 *definition and the criteria for Asian elderly people*. *Clin Calcium*. 2014;24(10):1441–8.
- 309 14. Reijnierse EM, De Van Der Schueren MAE, Trappenburg MC, Doves M, Meskers CGM,  
310 Maier AB. Lack of knowledge and availability of diagnostic equipment could hinder the  
311 diagnosis of sarcopenia and its management. *PLoS One*. 2017;12(10):e0185837.
- 312 15. Ha Y-C, Hwang S-C, Song S-Y, Lee C, Park K-S, Yoo J-I. Hand grip strength measurement in  
313 different epidemiologic studies using various methods for diagnosis of sarcopenia: a  
314 systematic review. *Eur Geriatr Med*. 2018;9:277–88.
- 315 16. Cawthon PM, Trivison TG, Manini TM, Patel S, Pencina KM, Fielding RA, et al. Establishing  
316 the link between lean mass and grip strength cut points with mobility disability and other  
317 health outcomes: proceedings of the sarcopenia definition and outcomes consortium  
318 conference. *Journals Gerontol Ser A*. 2020;75(7):1317–23.
- 319 17. Jordan MI, Mitchell TM. Machine learning: Trends, perspectives, and prospects. *Science*.  
320 2015;349(6245):255–60.
- 321 18. Kim YJ. Machine learning models for sarcopenia identification based on radiomic features of  
322 muscles in computed tomography. *Int J Environ Res Public Health*. 2021;18(16):8710.
- 323 19. Burns JE, Yao J, Chalhoub D, Chen JJ, Summers RM. A machine learning algorithm to

- 324 estimate sarcopenia on abdominal CT. *Acad Radiol.* 2020;27(3):311–20.
- 325 20. Ryu J, Eom S, Kim HC, Kim CO, Rhee Y, You SC, et al. Chest X-ray-based opportunistic  
326 screening of sarcopenia using deep learning. *J Cachexia Sarcopenia Muscle.* 2023;14(1):418–  
327 28.
- 328 21. Kang Y-J, Yoo J-I, Ha Y. Sarcopenia feature selection and risk prediction using machine  
329 learning: A cross-sectional study. *Medicine (Baltimore).* 2019;98(43).
- 330 22. Wu L-W, OuYoung T, Chiu Y-C, Hsieh H-F, Hsiu H. Discrimination between possible  
331 sarcopenia and metabolic syndrome using the arterial pulse spectrum and machine-learning  
332 analysis. *Sci Rep.* 2022;12(1):21452.
- 333 23. Beaudart C, Dawson A, Shaw SC, Harvey NC, Kanis JA, Binkley N, et al. Nutrition and  
334 physical activity in the prevention and treatment of sarcopenia: systematic review. *Osteoporos*  
335 *Int.* 2017;28:1817–33.
- 336 24. Kim KM, Jang HC, Lim S. Differences among skeletal muscle mass indices derived from  
337 height-, weight-, and body mass index-adjusted models in assessing sarcopenia. *Korean J*  
338 *Intern Med.* 2016;31(4):643.
- 339 25. Ko JB, Kim KB, Shin YS, Han H, Han SK, Jung DY, et al. Predicting Sarcopenia of Female  
340 Elderly from Physical Activity Performance Measurement Using Machine Learning Classifiers.  
341 *Clin Interv Aging.* 2021;1723–33.
- 342 26. Fukuoka Y, Narita T, Fujita H, Morii T, Sato T, Sassa MH, et al. Importance of physical  
343 evaluation using skeletal muscle mass index and body fat percentage to prevent sarcopenia in  
344 elderly Japanese diabetes patients. *J Diabetes Investig.* 2019;10(2):322–30.
- 345 27. Kim S, Yi C, Lim J. Risk Factors for Sarcopenia, Sarcopenic Obesity, and Sarcopenia Without  
346 Obesity in Older Adults. *Phys Ther Korea.* 2021;28(3):177–85.
- 347 28. Somasundaram E, Castiglione JA, Brady SL, Trout AT. Defining normal ranges of skeletal

- 348 muscle area and skeletal muscle index in children on CT using an automated deep learning  
349 pipeline: implications for sarcopenia diagnosis. *Am J Roentgenol.* 2022;219(2):326–36.
- 350 29. Tsekoura M, Kastrinis A, Katsoulaki M, Billis E, Gliatis J. Sarcopenia and its impact on  
351 quality of life. *GeNeDis 2016 Genet Neurodegener.* 2017;213–8.
- 352 30. Pillard F, Laoudj-Chenivesse D, Carnac G, Mercier J, Rami J, Rivière D, et al. Physical  
353 activity and sarcopenia. *Clin Geriatr Med.* 2011;27(3):449–70.
- 354 31. Bosaeus I, Rothenberg E. Nutrition and physical activity for the prevention and treatment of  
355 age-related sarcopenia. *Proc Nutr Soc.* 2016;75(2):174–80.
- 356
